# Supplementary material
Source: bioRxiv or medRxiv preprint supplement (https://www.biorxiv.org/highwire/filestream/9881/field_highwire_adjunct_files/1/023911-2.pdf)
Supplement: Supplementary file [file 023911-2.pdf]

## Supplementary Data 1: ENCODE datasets used in ChromNet (1,451 total)

### **K562** - 236 datasets

ENCSR557RVF (ZHX1), ENCSR815ZDS (SREBF1), ENCSR887ZEN (SIN3B), ENCSR364SNE (POU5F1), ENCSR485GKE (NFE2L2), ENCSR986CDX (NEUROD1), ENCSR376WCJ (IRF2), ENCSR124BJR (ETV6), ENCSR618GDK (CEBPZ), ENCSR782WRO (BMI1), ENCSR137ZMQ (REST), ENCSR851BNE (MEIS2), ENCSR109YGM (CREB3L1), ENCSR189PYJ (SMAD2), ENCSR038DJJ (SMAD1), ENCSR138FUZ (RNF2), ENCSR506CVF (RB1), ENCSR979UVS (PBX2), ENCSR111HAT (NONO), ENCSR010KFT (NONO), ENCSR509GDT (GFI1B), ENCSR443YGY (BMI1), ENCSR991ELG (SP1), ENCSR788RSW (SOX6), ENCSR414TTY (RUNX1), ENCSR274CGK (PAX8), ENCSR494TDU (NRF1), ENCSR998AJK (NRF1), ENCSR180NCY (MTA3), ENCSR486IFJ (ESRRA), ENCSR972ZBV (ATF7), ENCSR224IKA (TFDP1), ENCSR353HEP (TARDBP), ENCSR286PCG (ZBED1), ENCSR077DKV (CREM), ENCSR272JAT (CBX5), ENCSR000DOB (HMGN3), ENCSR000DOC (BRF2), ENCSR000DOA (CCNT2), ENCSR000DOF (NELFE), ENCSR000DOG (ATF3), ENCSR000DOD (GTF3C2), ENCSR000DOE (GTF2B), ENCSR000DOJ (BRF1), ENCSR000DOK (BDP1), ENCSR000DOH (SIRT6), ENCSR000DOI (POLR3A), ENCSR000DJY (eGFP-JUNB), ENCSR000DNZ (ATF1), ENCSR000DJW (eGFP-NR4A1), ENCSR000DJX (eGFP-JUND), ENCSR000DJZ (eGFP-HDAC8), ENCSR000DKA (eGFP-GATA2), ENCSR000DKB (eGFP-FOS), ENCSR000EHN (SMARCB1), ENCSR000EHP (POLR2A), ENCSR000EHQ (POLR3G), ENCSR000EHB (TAL1), ENCSR000EHC (GTF2F1), ENCSR000EHA (TBP), ENCSR000EHF (POLR2AphosphoS2), ENCSR000EHG (USF2), ENCSR000EHD (CHD2), ENCSR000EHE (CEBPB), ENCSR000EHJ (STAT1), ENCSR000EHK (STAT1), ENCSR000EHH (NRF1), ENCSR000EHO (SMARCA4), ENCSR000EHL (POLR2A), ENCSR000EGX (MAFK), ENCSR000EFZ (UBTF), ENCSR000EFP (ZNF384), ENCSR000EFQ (ZMIZ1), ENCSR000EFR (ZC3H11A), ENCSR000EFS (JUN), ENCSR000EFT (GATA1), ENCSR000EFU (ELK1), ENCSR000EFV (MAX), ENCSR000EFW (UBTF), ENCSR000EFX (MAZ), ENCSR000EFY (ARID3A), ENCSR000EFN (HCFC1), ENCSR000EFO (CUX1), ENCSR000DWB (H3K36me3), ENCSR000DWC (H3K27me3), ENCSR000EGW (SMC3), ENCSR000EWC (H3K4me1), ENCSR000EWB (H3K27me3), ENCSR000EWA (H3K4me3), ENCSR000EWG (GATA2), ENCSR000EWF (YY1), ENCSR000EWE (ZNF274), ENCSR000EWD (SETDB1), ENCSR000EWJ (E2F6), ENCSR000EWI (SETDB1), ENCSR000EWH (NR2C2), ENCSR000EWN (ZNF263), ENCSR000EWM (GATA1), ENCSR000EWL (E2F4), ENCSR000EVX (ZNF274), ENCSR000EVY (TRIM28), ENCSR000EVZ (H3K9ac), ENCSR000DWD (H3K4me3), ENCSR000DWE (CTCF), ENCSR000EGV (BHLHE40), ENCSR000EGU (IRF1),

ENCSR000EGT (IRF1), ENCSR000EGS (MYC), ENCSR000EGR (NFYA),  
ENCSR000EGQ (NFYB), ENCSR000EGP (ZNF143), ENCSR000EGZ (MXI1),  
ENCSR000EGY (EP300), ENCSR000EGC (RCOR1), ENCSR000EGB (TBL1XR1),  
ENCSR000EGA (TBL1XR1), ENCSR000EGG (RCOR1), ENCSR000EGF  
(POLR2AphosphoS2), ENCSR000EGE (EP300), ENCSR000EGD (BACH1),  
ENCSR000EGK (IRF1), ENCSR000EGJ (MYC), ENCSR000EGI (MAFF),  
ENCSR000EGH (JUN), ENCSR000EGO (RFX5), ENCSR000EGN (JUND),  
ENCSR000EGM (CTCF), ENCSR000EGL (IRF1), ENCSR000BRW (TRIM28),  
ENCSR000FCB (MITF), ENCSR000FCC (NFE2), ENCSR000FCE (ETV6),  
ENCSR000FCD (SMAD5), ENCSR000ATM (REST), ENCSR000AKU (H3K4me3),  
ENCSR000AQH (PHF8), ENCSR000AKS (H3K4me1), ENCSR000APC (H2AFZ),  
ENCSR000AUC (SUZ12), ENCSR000AUA (RNF2), ENCSR000AQF (HDAC1),  
ENCSR000AVE (WHSC1), ENCSR000AKR (H3K36me3), ENCSR000AKX (H4K20me1),  
ENCSR000AQA (KDM5B), ENCSR000AQJ (SAP30), ENCSR000AQB (EP300),  
ENCSR000AQE (EZH2), ENCSR000APE (H3K9me3), ENCSR000AKT (H3K4me2),  
ENCSR000ATZ (KAT2B), ENCSR000ATY (NCOR1), ENCSR000AUT (SETDB1),  
ENCSR000ATT (CREBBP), ENCSR000ATX (KDM1A), ENCSR000ATV (CBX3),  
ENCSR000AQI (RBBP5), ENCSR000ATW (CBX8), ENCSR000ATL (CHD4),  
ENCSR000AKP (H3K27ac), ENCSR000ATJ (HDAC6), ENCSR000APD (H3K79me2),  
ENCSR000AUB (SIRT6), ENCSR000AKO (CTCF), ENCSR000ATU (CBX2),  
ENCSR000AKQ (H3K27me3), ENCSR000AVD (CHD7), ENCSR000AKV (H3K9ac),  
ENCSR000AKW (H3K9me1), ENCSR000AQD (CHD1), ENCSR000AQG (HDAC2),  
ENCSR000DMA (CTCF), ENCSR000DLZ (MYC), ENCSR000FAD (RAD21),  
ENCSR000BNK (CTCFL), ENCSR000BNL (SP2), ENCSR000BNM (TAF7),  
ENCSR000BNN (THAP1), ENCSR000BMH (YY1), ENCSR000BMG (HDAC2),  
ENCSR000BME (ZBTB7A), ENCSR000FAZ (MYC), ENCSR000FAC (XRCC4),  
ENCSR000FAU (STAT1), ENCSR000FAT (STAT2), ENCSR000FAY (POLR2A),  
ENCSR000FAX (POLR2A), ENCSR000FAW (POLR2A), ENCSR000FAV (STAT1),  
ENCSR000BNE (EGR1), ENCSR000FAI (FOS), ENCSR000BRK (TEAD4),  
ENCSR000EZT (JUN), ENCSR000EZU (MYC), ENCSR000FAE (MAX),  
ENCSR000BQY (PML), ENCSR000BNV (MEF2A), ENCSR000BNU (ATF3),  
ENCSR000BNW (SIX5), ENCSR000BMD (ELF1), ENCSR000BRR (STAT5A),  
ENCSR000BRQ (CEBPB), ENCSR000FAJ (POLR2A), ENCSR000BLK (SRF),  
ENCSR000BLP (MAX), ENCSR000BLO (GABPA), ENCSR000BLR (SIN3A),  
ENCSR000DLY (POLR2A), ENCSR000BMV (FOSL1), ENCSR000BMW (REST),  
ENCSR000EZW (JUN), ENCSR000EZV (MYC), ENCSR000FBC (STAT2),  
ENCSR000EZX (JUN), ENCSR000BRT (CBX3), ENCSR000BRS (NR2F2),  
ENCSR000BVY (CEBPD), ENCSR000BMR (POLR2A), ENCSR000BGX (SIX5),  
ENCSR000BGW (SPI1), ENCSR000BKF (ZBTB33), ENCSR000BKS (TAF1),  
ENCSR000BKT (USF1), ENCSR000BKQ (ETS1), ENCSR000BKR  
(POLR2AphosphoS5), ENCSR000BKU (YY1), ENCSR000BKV (RAD21),  
ENCSR000BSO (CREB1), ENCSR000BPJ (CTCF), ENCSR000BKO (SP1),  
ENCSR000BKM (GATA2), ENCSR000BKH (BCLAF1), ENCSR000FAH (JUN),  
ENCSR000FAG (MYC), ENCSR000FAF (NFE2), ENCSR000BLI (E2F6)

**GM12878** - 143 datasets

ENCSR459FTB (UBTF), ENCSR769ZTN (GTF2F1), ENCSR332EYT (STAT1),  
ENCSR679FAB (RNF2), ENCSR916BOH (RB1), ENCSR664POU (RELA),

ENCSR974OFJ (KLF5), ENCSR408JQO (IRF3), ENCSR597VGC (ETV6),  
ENCSR517QHU (BHLHE40), ENCSR900XDB (ZFP36), ENCSR237YZZ (MAFF),  
ENCSR904YPP (NR3C1), ENCSR725LYT (ARID3A), ENCSR585CVE (BACH1),  
ENCSR009MBP (HSF1), ENCSR514VAY (HCFC1), ENCSR819ATC (MYB),  
ENCSR681NOM (CEBPB), ENCSR331HPA (GABPA), ENCSR117KWH (ZNF207),  
ENCSR637QAM (TRIM22), ENCSR016UEH (TARDBP), ENCSR501DKS (TCF7),  
ENCSR626VUC (ETV6), ENCSR839XZU (CREM), ENCSR000DNQ (ZZZ3),  
ENCSR000DNP (SUPT20H), ENCSR000DNM (NFYB), ENCSR000DNO (KAT2A),  
ENCSR000DNN (NFYA), ENCSR000DZC (RCOR1), ENCSR000DZQ (EBF1),  
ENCSR000DZP (SMC3), ENCSR000DZS (BRCA1), ENCSR000DZR (CHD2),  
ENCSR000DZO (NRF1), ENCSR000DZD (EP300), ENCSR000DZG (EP300),  
ENCSR000DZF (MAX), ENCSR000DZI (MXI1), ENCSR000DZK (POLR2AphosphoS2),  
ENCSR000DYS (JUND), ENCSR000DZJ (BHLHE40), ENCSR000DZL (ZNF143),  
ENCSR000DYT (SREBF2), ENCSR000DYU (SREBF1), ENCSR000EAA (WRNIP1),  
ENCSR000DZU (USF2), ENCSR000DZW (RFX5), ENCSR000DZY (NFE2),  
ENCSR000DZX (IRF3), ENCSR000DZZ (TBP), ENCSR000DZA (MAZ),  
ENCSR000DZM (STAT1), ENCSR000DZE (CHD1), ENCSR000DYX (SIN3A),  
ENCSR000DZN (CTCF), ENCSR000DYY (E2F4), ENCSR000EAD (POLR2A),  
ENCSR000EAG (RELA), ENCSR000EAC (RAD21), ENCSR000DYP (ZNF384),  
ENCSR000DYQ (ESRRA), ENCSR000DYR (CUX1), ENCSR000DRW (H3K36me3),  
ENCSR000DYV (MAFK), ENCSR000DZV (STAT3), ENCSR000EUK (ZNF274),  
ENCSR000EUJ (IKZF1), ENCSR000EUM (YY1), ENCSR000EUL (NR2C2),  
ENCSR000DRY (H3K4me3), ENCSR000DRX (H3K27me3), ENCSR000DRZ (CTCF),  
ENCSR000DYZ (TBL1XR1), ENCSR000DZB (ELK1), ENCSR000AKB (CTCF),  
ENCSR000ARD (EZH2), ENCSR000AKG (H3K4me2), ENCSR000AKC (H3K27ac),  
ENCSR000AOW (H3K79me2), ENCSR000AKE (H3K36me3), ENCSR000AOV (H2AFZ),  
ENCSR000AKF (H3K4me1), ENCSR000AKH (H3K9ac), ENCSR000AKA (H3K4me3),  
ENCSR000AKD (H3K27me3), ENCSR000AOX (H3K9me3), ENCSR000AKI  
(H4K20me1), ENCSR000DKV (CTCF), ENCSR000BQS (REST), ENCSR000BQT  
(TCF3), ENCSR000EYV (JUND), ENCSR000BRX (CEBPB), ENCSR000EYU  
(POLR3G), ENCSR000BUF (CREB1), ENCSR000BNP (YY1), ENCSR000BNQ (BCL3),  
ENCSR000BMI (SRF), ENCSR000BQM (PML), ENCSR000BQL (NFATC1),  
ENCSR000BQK (ATF2), ENCSR000BRU (FOXM1), ENCSR000BND (ZEB1),  
ENCSR000BMY (RAD21), ENCSR000BNG (MEF2C), ENCSR000BRI (RUNX3),  
ENCSR000BQZ (STAT5A), ENCSR000BRH (MTA3), ENCSR000BRG (EGR1),  
ENCSR000BGQ (SPI1), ENCSR000BGR (PBX3), ENCSR000BGP (POU2F2),  
ENCSR000BGS (TAF1), ENCSR000BGT (BATF), ENCSR000BMB (ELF1),  
ENCSR000BRN (NFIC), ENCSR000DKT (POLR2A), ENCSR000BGI (USF1),  
ENCSR000BGD (POLR2A), ENCSR000BGC (GABPA), ENCSR000BGF (REST),  
ENCSR000BGE (SRF), ENCSR000BIF (POLR2AphosphoS5), ENCSR000BJE (SIX5),  
ENCSR000BMQ (EGR1), ENCSR000DKU (MYC), ENCSR000BJD (RXRA),  
ENCSR000BHJ (PAX5), ENCSR000BHK (SP1), ENCSR000BHD (PAX5),  
ENCSR000BHC (ZBTB33), ENCSR000BGU (EBF1), ENCSR000BHB (EP300),  
ENCSR000BHA (BCL11A), ENCSR000BGZ (TCF12), ENCSR000BGY (IRF4),  
ENCSR000BKA (ETS1), ENCSR000BKB (MEF2A), ENCSR000BJY (ATF3),  
ENCSR000BJZ (BCLAF1), ENCSR000EYZ (FOS)

### **HepG2 - 115 datasets**

ENCSR157CAU (ZKSCAN1), ENCSR771GTF (SUZ12), ENCSR620YNB (KAT2B),  
ENCSR452YHM (SIN3B), ENCSR529JYA (HCFC1), ENCSR049KIZ (CUX1),  
ENCSR177HDZ (FOS), ENCSR699TNT (BACH1), ENCSR219NRT (GTF2F1),  
ENCSR488EES (NFE2L2), ENCSR928API (RFX1), ENCSR407BEZ (ZHX2),  
ENCSR000DUF (H3K4me3), ENCSR000DUG (CTCF), ENCSR000EDX  
(POLR2AphosphoS2), ENCSR000EDV (EP300), ENCSR000DUD (H3K36me3),  
ENCSR000EEX (CEBPB), ENCSR000EDY (BRCA1), ENCSR000EEQ (PPARGC1A),  
ENCSR000EEU (HNF4A), ENCSR000EDW (SMC3), ENCSR000EET (HSF1),  
ENCSR000EEW (ESRRA), ENCSR000EEV (NR3C1), ENCSR000EEI (JUND),  
ENCSR000EEH (NRF1), ENCSR000EEK (JUN), ENCSR000EEJ (IRF3),  
ENCSR000EEM (POLR2A), ENCSR000EEL (TBP), ENCSR000EEO (SREBF1),  
ENCSR000EEA (RFX5), ENCSR000EEC (MAFF), ENCSR000EEB (MAFK),  
ENCSR000EEE (CEBPB), ENCSR000EED (CHD2), ENCSR000EEG (RAD21),  
ENCSR000EEF (USF2), ENCSR000EDZ (MAFK), ENCSR000EVQ (TCF7L2),  
ENCSR000EVR (ZNF274), ENCSR000EVS (NR2C2), ENCSR000EEP (POLR2A),  
ENCSR000DUE (H3K27me3), ENCSR000EDT (BHLHE40), ENCSR000EDU (MXI1),  
ENCSR000EDS (MAX), ENCSR000EDP (ARID3A), ENCSR000EDQ (RCOR1),  
ENCSR000EDN (MAZ), ENCSR000EDO (CEBPZ), ENCSR101FJU (ZNF384),  
ENCSR101FJS (TBL1XR1), ENCSR101FJT (ZNF143), ENCSR000ATD (H3K9me3),  
ENCSR000AMP (H3K4me3), ENCSR000AOL (H3K27me3), ENCSR000AOK (H2AFZ),  
ENCSR000AMQ (H4K20me1), ENCSR000APV (H3K4me1), ENCSR000AMB  
(H3K36me3), ENCSR000AMA (CTCF), ENCSR000ARI (EZH2), ENCSR000AMC  
(H3K4me2), ENCSR000AMO (H3K27ac), ENCSR000AOM (H3K79me2),  
ENCSR000AMD (H3K9ac), ENCSR000EZP (SREBF1), ENCSR000EZO (SREBF2),  
ENCSR000EZQ (POLR2A), ENCSR000BQW (MBD4), ENCSR000BQX (NFIC),  
ENCSR000BNI (FOXA2), ENCSR000BNJ (HNF4G), ENCSR000BQJ (CEBPD),  
ENCSR000BQI (CEBPB), ENCSR000BMZ (ELF1), ENCSR000BNA (ZBTB33),  
ENCSR000BVN (ZEB1), ENCSR000BVM (NR2F2), ENCSR000BVL (CREB1),  
ENCSR000BTM (MAX), ENCSR000BNT (YY1), ENCSR000BGM (USF1),  
ENCSR000BGK (JUND), ENCSR000BGL (SIN3A), ENCSR000BMC (HDAC2),  
ENCSR000BLW (EP300), ENCSR000BLV (SRF), ENCSR000BRP (TEAD4),  
ENCSR000BRO (MYBL2), ENCSR000BID (BHLHE40), ENCSR000BIE (CTCF),  
ENCSR000BLS (RAD21), ENCSR000DLQ (POLR2A), ENCSR000BMO (FOXA1),  
ENCSR000DLR (MYC), ENCSR000DLS (CTCF), ENCSR000BJG (TCF12),  
ENCSR000BJK (GABPA), ENCSR000BJL (REST), ENCSR000BJN (TAF1),  
ENCSR000BJM (POLR2A), ENCSR000BOT (REST), ENCSR000BOU (SP2),  
ENCSR000BKE (ATF3), ENCSR000BJX (SP1), ENCSR000BHR (ZBTB33),  
ENCSR000BHP (FOSL2), ENCSR000BHU (RXRA), ENCSR000BQA (ZBTB7A),  
ENCSR000BPI (POLR2AphosphoS5), ENCSR000BLF (HNF4A), ENCSR000BLE  
(FOXA1)

### **A549 - 94 datasets**

ENCSR294JWV (ZFP36), ENCSR277OOQ (ZC3H11A), ENCSR563FBT (USF2),  
ENCSR638QYO (SREBF2), ENCSR897MYK (SREBF1), ENCSR513XQX (SIN3A),  
ENCSR064LJN (RFX5), ENCSR356WVQ (KAT2B), ENCSR541WQI (MAFK),  
ENCSR584GHV (NFE2L2), ENCSR636YLV (MAZ), ENCSR116TFA (NR3C1),  
ENCSR473SUA (ESRRA), ENCSR623KNM (ELK1), ENCSR618ICR (RCOR1),

ENCSR067HGI (CHD2), ENCSR398YBM (CHD1), ENCSR996DUT (JUN),  
ENCSR857KDI (BRCA1), ENCSR043EHG (BACH1), ENCSR000DYJ (BHLHE40),  
ENCSR000DYI (CEBPB), ENCSR000DYG (MAX), ENCSR000DYF  
(POLR2AphosphoS2), ENCSR000DYE (RAD21), ENCSR000DYD (CTCF),  
ENCSR000DYC (MYC), ENCSR000DPF (CTCF), ENCSR000DPD (H3K4me3),  
ENCSR000DNA (CTCF), ENCSR000DMZ (POLR2A), ENCSR000BUD (TEAD4),  
ENCSR000BUC (RAD21), ENCSR000BUB (CEBPB), ENCSR000BTN (PBX3),  
ENCSR000BTJ (MAX), ENCSR000BTI (GATA3), ENCSR000BTC (E2F6),  
ENCSR000BRM (SIN3A), ENCSR000BRL (SIX5), ENCSR000BRF (JUND),  
ENCSR000BRE (FOXA2), ENCSR000BRD (FOXA1), ENCSR000BRC (CREB1),  
ENCSR000BRB (CREB1), ENCSR000BRA (CREB1), ENCSR000BQQ (TCF12),  
ENCSR000BQP (REST), ENCSR000BQO (FOSL2), ENCSR000BQH (BCL3),  
ENCSR000BPZ (ZBTB33), ENCSR000BPY (GABPA), ENCSR000BPX (FOXA1),  
ENCSR000BPW (EP300), ENCSR000BPV (USF1), ENCSR000BPU (ETS1),  
ENCSR000BPT (ELF1), ENCSR000BPS (ATF3), ENCSR000BPM (YY1),  
ENCSR000BPF (TAF1), ENCSR000BPE (SP1), ENCSR000BJT (NR3C1),  
ENCSR000BJR (NR3C1), ENCSR000BJB (USF1), ENCSR000BIO (NR3C1),  
ENCSR000BHX (USF1), ENCSR000BHW (CTCF), ENCSR000BHV (CTCF),  
ENCSR000BHI (POLR2A), ENCSR000BHH (POLR2A), ENCSR000BHG (NR3C1),  
ENCSR000BHF (NR3C1), ENCSR000BHE (NR3C1), ENCSR000AUL (H3K36me3),  
ENCSR000AUN (H3K9me3), ENCSR000AUF (CTCF), ENCSR000AUI (H3K27ac),  
ENCSR000AUE (CTCF), ENCSR000AUJ (H3K27me3), ENCSR000AST (H3K4me3),  
ENCSR000AVG (H3K36me3), ENCSR000ATP (H3K79me2), ENCSR000AUK  
(H3K27me3), ENCSR000AVI (H3K4me2), ENCSR000AUG (H2AFZ), ENCSR000ASH  
(H3K4me3), ENCSR000ASU (H3K79me2), ENCSR000ASV (H3K9ac), ENCSR000AVH  
(H3K4me1), ENCSR000AUH (H2AFZ), ENCSR000AUM (H3K4me1), ENCSR000AUO  
(H4K20me1), ENCSR000AVF (H3K27ac), ENCSR000ATO (H3K4me2)

### **HeLa-S3 - 85 datasets**

ENCSR855WKQ (ZHX1), ENCSR887MXT (ZHX1), ENCSR184MFH (ZFP36),  
ENCSR680OFU (EP300), ENCSR140DSL (MAFF), ENCSR392EAA (CHD1),  
ENCSR611WZO (SREBF2), ENCSR000EVM (HA-E2F1), ENCSR000EZL (POLR2A),  
ENCSR000EZK (STAT1), ENCSR000EZF (MAX), ENCSR000EZE (FOS),  
ENCSR000EZD (MYC), ENCSR000EZC (SMARCA4), ENCSR000EVN (NR2C2),  
ENCSR000EVL (E2F4), ENCSR000EVK (E2F6), ENCSR000EVJ (E2F1), ENCSR000EVI  
(ELK4), ENCSR000EVG (ZNF274), ENCSR000EVF (TCF7L2), ENCSR000EVE  
(TCF7L2), ENCSR000EDM (SMARCC1), ENCSR000EDL (SMARCC2), ENCSR000EDK  
(SMARCB1), ENCSR000EDJ (NRF1), ENCSR000EDH (JUND), ENCSR000EDG (JUN),  
ENCSR000EDF (IRF3), ENCSR000EDE (RAD21), ENCSR000EDD (TBP),  
ENCSR000EDC (STAT3), ENCSR000EDB (BRCA1), ENCSR000EDA (CEBPB),  
ENCSR000ECZ (GTF2F1), ENCSR000ECY (PRDM1), ENCSR000ECX (RFX5),  
ENCSR000ECW (USF2), ENCSR000ECV (EP300), ENCSR000ECU (MXI1),  
ENCSR000ECT (POLR2AphosphoS2), ENCSR000ECS (SMC3), ENCSR000ECR  
(KAT2A), ENCSR000ECQ (SUPT20H), ENCSR000ECP (CHD2), ENCSR000ECO  
(ZNF143), ENCSR000ECN (MAX), ENCSR000ECM (RCOR1), ENCSR000ECL (MAZ),  
ENCSR000ECK (MAFK), ENCSR000ECJ (ZKSCAN1), ENCSR000ECI (ELK1),  
ENCSR000ECH (HCF1), ENCSR000DUB (CTCF), ENCSR000DUA (H3K4me3),  
ENCSR000DTZ (H3K36me3), ENCSR000DTY (H3K27me3), ENCSR000DNY (GTF3C2),

ENCSR000DNX (BDP1), ENCSR000DNW (BRF1), ENCSR000DNV (BRF2),  
ENCSR000DNU (POLR3A), ENCSR000DNT (ZZZ3), ENCSR000DNS (NFYA),  
ENCSR000DNR (NFYB), ENCSR000DLO (CTCF), ENCSR000DLN (MYC),  
ENCSR000DLM (POLR2A), ENCSR000BMN (REST), ENCSR000BHT (TAF1),  
ENCSR000BHS (GABPA), ENCSR000BGO (POLR2A), ENCSR000AOF (H3K4me3),  
ENCSR000AOA (CTCF), ENCSR000AOC (H3K27ac), ENCSR000AOH (H3K9ac),  
ENCSR000APW (H3K4me1), ENCSR000AQO (H3K9me3), ENCSR000AOE (H3K4me2),  
ENCSR000APB (H3K27me3), ENCSR000ATC (EZH2), ENCSR000AOD (H3K36me3),  
ENCSR000AOI (H4K20me1), ENCSR000AQN (H2AFZ), ENCSR000AOG (H3K79me2)

#### **H1-hESC - 84 datasets**

ENCSR000EUQ (SUZ12), ENCSR000EUP (MAX), ENCSR000EUO (CTBP2),  
ENCSR000EUN (ZNF274), ENCSR000ECF (RFX5), ENCSR000ECE (RAD21),  
ENCSR000ECD (USF2), ENCSR000ECC (NRF1), ENCSR000ECB (TBP),  
ENCSR000ECA (JUN), ENCSR000EBZ (JUND), ENCSR000EBY (MYC),  
ENCSR000EBX (BRCA1), ENCSR000EBW (ZNF143), ENCSR000EBV (CEBPB),  
ENCSR000EBU (CHD1), ENCSR000EBT (CHD2), ENCSR000EBS (MAFK),  
ENCSR000EBR (MXI1), ENCSR000EBQ (BACH1), ENCSR000EBP (GTF2F1),  
ENCSR000EBO (SIN3A), ENCSR000DLK (CTCF), ENCSR000DLJ (POLR2A),  
ENCSR000DLI (MYC), ENCSR000BSN (CREB1), ENCSR000BSJ (MAX),  
ENCSR000BSI (E2F6), ENCSR000BRY (TEAD4), ENCSR000BQV (SP4),  
ENCSR000BQU (ATF2), ENCSR000BQG (SP2), ENCSR000BNS (FOSL1),  
ENCSR000BNR (HDAC2), ENCSR000BNH (CTCF), ENCSR000BMU (POU5F1),  
ENCSR000BMT (NANOG), ENCSR000BMJ (BCL11A), ENCSR000BLU (TAF7),  
ENCSR000BLD (RAD21), ENCSR000BKP (JUND), ENCSR000BKK (EP300),  
ENCSR000BKD (YY1), ENCSR000BKC (ATF3), ENCSR000BJW (RXRA),  
ENCSR000BJA (EGR1), ENCSR000BIW (GABPA), ENCSR000BIV (SRF),  
ENCSR000BIU (USF1), ENCSR000BIT (TCF12), ENCSR000BIS (SIN3A),  
ENCSR000BIR (SP1), ENCSR000BIQ (SIX5), ENCSR000BIP (BCL11A), ENCSR000BIC  
(POLR2A<sup>phosphoS5</sup>), ENCSR000BHO (TAF1), ENCSR000BHN (POLR2A),  
ENCSR000BHM (REST), ENCSR000AVA (CHD7), ENCSR000APZ (H3K9me3),  
ENCSR000APX (H2AFZ), ENCSR000AMG (H3K4me3), ENCSR000AMF (CTCF),  
ENCSR000ALU (H3K27me3), ENCSR000ATS (SUZ12), ENCSR000AQC (RBBP5),  
ENCSR000ANA (H3K4me1), ENCSR000AQK (CHD1), ENCSR000ANB (H3K36me3),  
ENCSR000AUS (SIRT6), ENCSR000AUQ (EP300), ENCSR000AVC (KDM4A),  
ENCSR000AUR (KDM5B), ENCSR000AMH (H4K20me1), ENCSR000ASY (EZH2),  
ENCSR000AVB (HDAC2), ENCSR000APY (H3K79me2), ENCSR000ANC (H3K4me2),  
ENCSR000AND (H3K9ac), ENCSR000ATQ (HDAC6), ENCSR000ATR (SAP30),  
ENCSR000ANP (H3K27ac), ENCSR000AQL (KDM5A), ENCSR000ATK (PHF8)

#### **MCF-7 - 55 datasets**

ENCSR924TVL (RFX5), ENCSR348JOJ (MTA1), ENCSR663ZZZ (MNT),  
ENCSR288IJC (MAZ), ENCSR555PBN (MAFK), ENCSR176EXN (JUN),  
ENCSR062HDL (HSF1), ENCSR557JTZ (GTF2F1), ENCSR954WVZ (ESRRA),  
ENCSR875KOJ (H3K4me2), ENCSR999WHE (H3K9me3), ENCSR000EWX (HA-E2F1),  
ENCSR000EWV (GATA3), ENCSR000EWU (ZNF217), ENCSR000EWT (TCF7L2),  
ENCSR000EWS (GATA3), ENCSR000EWR (H3K27ac), ENCSR000EWQ (H3K9me3),  
ENCSR000EWP (H3K27me3), ENCSR000EWO (H3K36me3), ENCSR000DWJ

(H3K4me3), ENCSR000DWH (CTCF), ENCSR000DMV (CTCF), ENCSR000DMT (POLR2A), ENCSR000DMS (CTCF), ENCSR000DMR (CTCF), ENCSR000DMQ (MYC), ENCSR000DMP (MYC), ENCSR000DMO (CTCF), ENCSR000DMN (POLR2A), ENCSR000DMM (MYC), ENCSR000DML (CTCF), ENCSR000DMK (POLR2A), ENCSR000DMJ (MYC), ENCSR000BVA (SRF), ENCSR000BUZ (PML), ENCSR000BUY (NR2F2), ENCSR000BUX (EGR1), ENCSR000BUO (TEAD4), ENCSR000BUN (TCF12), ENCSR000BUM (SIN3A), ENCSR000BUL (MAX), ENCSR000BUK (GABPA), ENCSR000BUJ (FOXM1), ENCSR000BUI (FOSL2), ENCSR000BTR (EP300), ENCSR000BTQ (RAD21), ENCSR000BTP (HDAC2), ENCSR000BSU (JUND), ENCSR000BST (GATA3), ENCSR000BSS (ELF1), ENCSR000BSR (CEBPB), ENCSR000BSP (REST), ENCSR000AHF (TAF1), ENCSR000AHD (CTCF)

#### **SK-N-SH** - 44 datasets

ENCSR000DXR (H3K4me3), ENCSR000EHX (RAD21), ENCSR000DXQ (CTCF), ENCSR000DXP (H3K27me3), ENCSR000EHW (SMC3), ENCSR000EHZ (NRF1), ENCSR000EHY (RFX5), ENCSR000EHV (EP300), ENCSR000EIB (JUND), ENCSR000DXO (H3K36me3), ENCSR000EIA (MXI1), ENCSR000EIC (CTCF), ENCSR000BSM (YY1), ENCSR000BSL (TCF12), ENCSR000BSK (JUND), ENCSR000BUA (EP300), ENCSR000BVG (RXRA), ENCSR000BVE (PBX3), ENCSR000BMF (USF1), ENCSR000BQF (TAF1), ENCSR000BTZ (USF1), ENCSR000BTS (ZBTB33), ENCSR000BTH (GATA3), ENCSR000BTG (GABPA), ENCSR000BTB (FOXM1), ENCSR000BMA (EP300), ENCSR000BLY (RAD21), ENCSR000BLZ (YY1), ENCSR000BLX (CTCF), ENCSR000BVC (MEF2A), ENCSR000BVD (MAX), ENCSR000BVB (FOSL2), ENCSR000BTA (ELF1), ENCSR000BUQ (TEAD4), ENCSR000BJJ (REST), ENCSR000BOZ (REST), ENCSR000BSV (NFIC), ENCSR000BPB (SIN3A), ENCSR000BPA (POLR2AphosphoS5), ENCSR000FCV (H3K36me3), ENCSR000FCU (H3K27ac), ENCSR000FCT (H3K9me3), ENCSR000FCS (H3K4me3), ENCSR000FCR (H3K4me1)

#### **endothelial cell of umbilical vein** - 28 datasets

ENCSR000EFA (JUN), ENCSR000EFB (POLR2A), ENCSR000DVP (CTCF), ENCSR000DVM (H3K36me3), ENCSR000EEZ (MAX), ENCSR000DVO (H3K27me3), ENCSR000DVN (H3K4me3), ENCSR000EVU (FOS), ENCSR000EVW (GATA2), ENCSR000ALD (H3K9ac), ENCSR000ATA (EZH2), ENCSR000ASD (H3K79me2), ENCSR000AKK (H3K27me3), ENCSR000ATB (H3K9me3), ENCSR000ASC (H2AFZ), ENCSR000ALC (H3K36me3), ENCSR000ALF (H4K20me1), ENCSR000AKN (H3K4me3), ENCSR000ALA (CTCF), ENCSR000AKM (H3K4me2), ENCSR000ALB (H3K27ac), ENCSR000AKL (H3K4me1), ENCSR000ALE (H3K9me1), ENCSR000DLW (CTCF), ENCSR000DLV (POLR2A), ENCSR000DLU (MYC), ENCSR000BQC (POLR2AphosphoS5), ENCSR000BQB (POLR2A)

#### **HCT116** - 28 datasets

ENCSR000DTQ (H3K4me3), ENCSR000DTO (CTCF), ENCSR000BNY (ZBTB33), ENCSR000BVJ (TEAD4), ENCSR000BML (POLR2AphosphoS5), ENCSR000EUS (H3K4me1), ENCSR000EUU (POLR2A), ENCSR000EUT (H3K27ac), ENCSR000EUV (TCF7L2), ENCSR000BSH (MAX), ENCSR000BSD (CEBPB), ENCSR000BSE (CTCF), ENCSR000BSF (SP1), ENCSR000BSG (SIN3A), ENCSR000BSA (JUND),

ENCSR000BSB (RAD21), ENCSR000BSC (SRF), ENCSR000BNX (YY1),  
ENCSR000BRZ (EGR1), ENCSR000BUH (CBX3), ENCSR000BVK (USF1),  
ENCSR000BUG (ATF3), ENCSR000BVI (REST), ENCSR000BVH (ELF1),  
ENCSR000BTE (FOSL1), ENCSR101FJM (ZNF274), ENCSR000FCQ (H3K36me3),  
ENCSR000FCP (H3K9me3)

**Ishikawa - 25 datasets**

ENCSR000BQE (CTCF), ENCSR000BTY (MAX), ENCSR000BJC (NR3C1),  
ENCSR000BSZ (ZBTB7A), ENCSR000BUS (FOXM1), ENCSR000BTD (SRF),  
ENCSR000BLB (NR3C1), ENCSR000BIZ (ESR1), ENCSR000BUE (EP300),  
ENCSR000BTT (CEBPB), ENCSR000BUV (TCF12), ENCSR000BSX (USF1),  
ENCSR000BKW (FOXA1), ENCSR000BTU (RAD21), ENCSR000BUR (CREB1),  
ENCSR000BTO (TAF1), ENCSR000BUT (NFIC), ENCSR000BKL (ESR1),  
ENCSR000BUU (REST), ENCSR000BQR (ESR1), ENCSR000BSY (YY1),  
ENCSR000BSQ (EGR1), ENCSR000BSW (TEAD4), ENCSR000BKI (POLR2A),  
ENCSR000BIY (ESR1)

**fibroblast of lung - 22 datasets**

ENCSR000DPK (H3K27me3), ENCSR000DPJ (H3K9me3), ENCSR000DPO (H3K4me3),  
ENCSR000DPL (H3K27ac), ENCSR000DWZ (H3K4me3), ENCSR000DWY (CTCF),  
ENCSR000DPM (CTCF), ENCSR000DVC (H3K4me3), ENCSR000DVA (CTCF),  
ENCSR000AMU (H3K4me1), ENCSR000AMR (H3K27ac), ENCSR000ASF (H3K79me2),  
ENCSR000AMY (H4K20me1), ENCSR000AMV (H3K4me2), ENCSR000ANO (CTCF),  
ENCSR000AMS (H3K27me3), ENCSR000AMT (H3K36me3), ENCSR000ARQ  
(H3K9me3), ENCSR000ARP (H2AFZ), ENCSR000ARO (EZH2), ENCSR000AMW  
(H3K4me3), ENCSR000AMX (H3K9ac)

**keratinocyte - 19 datasets**

ENCSR000DWX (CTCF), ENCSR000DWW (H3K36me3), ENCSR000DWV (H3K4me3),  
ENCSR000DWU (H3K27me3), ENCSR000ALK (H3K27ac), ENCSR000ALP (H3K9ac),  
ENCSR000ARL (H2AFZ), ENCSR000ALM (H3K36me3), ENCSR000ALN (H3K4me2),  
ENCSR000ARK (EZH2), ENCSR000ALQ (H3K9me1), ENCSR000ARM (H3K79me2),  
ENCSR000ALR (H4K20me1), ENCSR000ALJ (CTCF), ENCSR000ALO (H3K4me3),  
ENCSR000ALI (H3K4me1), ENCSR000ALL (H3K27me3), ENCSR000ARN (H3K9me3),  
ENCSR000DNC (CTCF)

**neural cell - 17 datasets**

ENCSR404BPV (SMC3), ENCSR198ZYJ (RAD21), ENCSR934NHU (MXI1),  
ENCSR843ZUP (EP300), ENCSR822CEA (CTCF), ENCSR654VRX (H3K27me3),  
ENCSR714KGG (H3K36me3), ENCSR511CUH (EZH2), ENCSR076NBJ (H3K79me2),  
ENCSR329NAJ (H3K4me1), ENCSR045HLL (H3K4me2), ENCSR816JBG (H2AFZ),  
ENCSR608VNA (H3K4me3), ENCSR124VOE (H3K27ac), ENCSR000BTW  
(POLR2AphosphoS5), ENCSR000BTV (REST), ENCSR000BTX (TAF1)

**mammary epithelial cell - 16 datasets**

ENCSR000DUT (H3K27me3), ENCSR000DUQ (H3K4me3), ENCSR000DUS (CTCF),  
ENCSR000ALZ (H3K9ac), ENCSR000ALV (CTCF), ENCSR000ASB (H3K79me2),  
ENCSR000AMK (H3K4me2), ENCSR000ARF (H2AFZ), ENCSR000ARG (H3K9me3),



ENCSR000AML (H3K4me3), ENCSR000AMJ (H3K4me1), ENCSR000ALW (H3K27ac),  
ENCSR000AMM (H4K20me1), ENCSR000ARE (EZH2), ENCSR000ALY (H3K36me3),  
ENCSR000ALX (H3K27me3)

**SUDHL6** - 14 datasets

ENCSR694PMV (H3K4me1), ENCSR316KHQ (H3K36me3), ENCSR114GLZ (H3K9ac),  
ENCSR869HJR (H2AFZ), ENCSR307DQT (H3K27ac), ENCSR125DKL (CTCF),  
ENCSR018LUP (H3K9me2), ENCSR494LJG (H3K4me3), ENCSR587FCM (H3K9me3),  
ENCSR538KLU (H4K20me1), ENCSR471VHW (H3K79me2), ENCSR090TRI (EZH2),  
ENCSR804MDH (H3K4me2), ENCSR511OIE (H3K27me3)

**Karpas-422** - 14 datasets

ENCSR646CKG (EZH2), ENCSR113REG (CTCF), ENCSR317NQG (H2AFZ),  
ENCSR604III (H3K79me2), ENCSR867UKC (H3K36me3), ENCSR306VSH (H3K4me1),  
ENCSR870IGD (H3K4me2), ENCSR978BQI (H3K9me3), ENCSR159CDJ (H4K20me1),  
ENCSR473TDG (H3K9me2), ENCSR910XKX (H3K4me3), ENCSR963HAR  
(H3K27me3), ENCSR058SHN (H3K9ac), ENCSR660IQS (H3K27ac)

**CD14-positive monocyte** - 14 datasets

ENCSR000DWM (H3K27me3), ENCSR000DWL (H3K4me3), ENCSR000ATF (H3K9ac),  
ENCSR000ASP (H3K9me3), ENCSR000ASN (H3K4me3), ENCSR000ASI (H2AFZ),  
ENCSR000ASO (H3K79me2), ENCSR000ASK (H3K27me3), ENCSR000ATN (CTCF),  
ENCSR000ASQ (H4K20me1), ENCSR000ASJ (H3K27ac), ENCSR000ASL (H3K36me3),  
ENCSR000ASM (H3K4me1), ENCSR000ATE (H3K4me2)

**skeletal muscle myoblast** - 13 datasets

ENCSR000ANK (H3K4me3), ENCSR000ANI (H3K4me1), ENCSR000APA (H2AFZ),  
ENCSR000ANE (CTCF), ENCSR000ANJ (H3K4me2), ENCSR000ANL (H3K9ac),  
ENCSR000ANF (H3K27ac), ENCSR000ANR (H3K9me3), ENCSR000ARH (EZH2),  
ENCSR000ANQ (H3K79me2), ENCSR000ANH (H3K36me3), ENCSR000ANG  
(H3K27me3), ENCSR000ANM (H4K20me1)

**myotube** - 13 datasets

ENCSR000ANZ (H3K4me3), ENCSR000ANY (H3K4me2), ENCSR000ASZ (EZH2),  
ENCSR000ANS (CTCF), ENCSR000ANU (H2AFZ), ENCSR000ATI (H3K27me3),  
ENCSR000AOZ (H4K20me1), ENCSR000ANX (H3K4me1), ENCSR000ANV (H3K27ac),  
ENCSR000ANW (H3K36me3), ENCSR000AOY (H3K9ac), ENCSR000AQM (H3K9me3),  
ENCSR000AON (H3K79me2)

**fibroblast of dermis** - 13 datasets

ENCSR000ASE (EZH2), ENCSR000ARJ (H4K20me1), ENCSR000APO (H3K27me3),  
ENCSR000APQ (H3K4me2), ENCSR000ARX (H3K9me3), ENCSR000APS (H3K9ac),  
ENCSR000ARV (H3K4me1), ENCSR000ARW (H3K79me2), ENCSR000APN (H3K27ac),  
ENCSR000APP (H3K36me3), ENCSR000APM (CTCF), ENCSR000APR (H3K4me3),  
ENCSR000ATG (H2AFZ)

**astrocyte** - 13 datasets

ENCSR000AQQ (H3K79me2), ENCSR000AOR (H3K27me3), ENCSR000ART (H3K9ac),

ENCSR000AOT (H3K4me1), ENCSR000AQR (H3K9me3), ENCSR000AOS (H3K36me3),  
ENCSR000AOU (H3K4me3), ENCSR000AOO (CTCF), ENCSR000AOQ (H3K27ac),  
ENCSR000ARU (H4K20me1), ENCSR000ARR (EZH2), ENCSR000AQP (H2AFZ),  
ENCSR000ARS (H3K4me2)

**Panc1** - 13 datasets

ENCSR000EXJ (H3K4me1), ENCSR000EXK (H3K27ac), ENCSR000EXI (H3K4me3),  
ENCSR000EXL (TCF7L2), ENCSR000DXB (H3K4me3), ENCSR000FCO (H3K27me3),  
ENCSR000FCN (H3K9me3), ENCSR000FCM (H3K36me3), ENCSR000BUP (REST),  
ENCSR000BJO (REST), ENCSR000BPK (REST), ENCSR000BOW (SIN3A),  
ENCSR000BOV (POLR2AphosphoS5)

**DND-41** - 13 datasets

ENCSR000AQZ (H3K4me2), ENCSR000ARY (H3K9ac), ENCSR000ARB (H3K79me2),  
ENCSR000ARC (H4K20me1), ENCSR000AQU (CTCF), ENCSR000AQX (H3K36me3),  
ENCSR000ARZ (H3K9me3), ENCSR000ASW (EZH2), ENCSR000ARA (H3K4me3),  
ENCSR000ASX (H3K27me3), ENCSR000AQW (H3K27ac), ENCSR000AQY (H3K4me1),  
ENCSR000AQV (H2AFZ)

**osteoblast** - 12 datasets

ENCSR000API (H3K36me3), ENCSR000APL (H3K9me3), ENCSR000APK (H3K4me2),  
ENCSR000AUD (EP300), ENCSR000APF (CTCF), ENCSR000ASG (H3K79me2),  
ENCSR000APJ (H3K4me1), ENCSR000ATH (H3K4me3), ENCSR000APH (H3K27ac),  
ENCSR000AQT (H4K20me1), ENCSR000APG (H2AFZ), ENCSR000AQS (H3K27me3)

**cardiac mesoderm** - 12 datasets

ENCSR000DSP (H3K4me3), ENCSR000DSO (H3K4me3), ENCSR000DSM (H3K27me3),  
ENCSR000DSL (H3K27me3), ENCSR000DSK (H3K27me3), ENCSR000DSJ  
(H3K27me3), ENCSR000DSI (H3K36me3), ENCSR000DSH (H3K36me3),  
ENCSR000DSG (H3K36me3), ENCSR000DSF (H3K36me3), ENCSR000DSE (H3K4me3),  
ENCSR000DSD (H3K4me3)

**MCF 10A** - 12 datasets

ENCSR000DPC (POLR2A), ENCSR000DPB (STAT3), ENCSR000DPA (POLR2A),  
ENCSR000DOZ (STAT3), ENCSR000DOT (FOS), ENCSR000DOS (MYC),  
ENCSR000DOR (E2F4), ENCSR000DOQ (STAT3), ENCSR000DOP (FOS),  
ENCSR000DOO (FOS), ENCSR000DON (FOS), ENCSR000DOM (MYC)

**HEK293** - 12 datasets

ENCSR000DTW (CTCF), ENCSR000DTU (H3K4me3), ENCSR000EVB (ELK4),  
ENCSR000EUY (TCF7L2), ENCSR000EUZ (TRIM28), ENCSR000EVD (ZNF263),  
ENCSR000FCK (H3K36me3), ENCSR000FCJ (H3K9me3), ENCSR000FCI (ZNF274),  
ENCSR000FCH (H3K27ac), ENCSR000FCG (H3K4me1), ENCSR000EZA (POLR2A)

**DOHH2** - 12 datasets

ENCSR623GZY (H3K79me2), ENCSR279JHU (H4K20me1), ENCSR350RYG  
(H3K27me3), ENCSR784AQY (H3K36me3), ENCSR992YSL (H3K4me2),  
ENCSR052WRV (H3K4me3), ENCSR627TNG (H3K9me3), ENCSR741STU (H3K27ac),

ENCSR460SEN (H3K4me1), ENCSR696NGW (H3K9ac), ENCSR463DSJ (H3K9me2),  
ENCSR084RDK (CTCF)

**OCI-LY7** - 11 datasets

ENCSR660IQK (H3K9ac), ENCSR447ZGY (H3K27ac), ENCSR243AIS (H3K36me3),  
ENCSR060WGG (H3K4me1), ENCSR005SXO (H3K4me3), ENCSR389WWC  
(H3K9me3), ENCSR747ZDF (H4K20me1), ENCSR331RGM (H2AFZ), ENCSR027HML  
(CTCF), ENCSR752KQT (H3K27me3), ENCSR850QKN (H3K4me2)

**OCI-LY3** - 11 datasets

ENCSR996GHD (H3K9ac), ENCSR629TDG (H2AFZ), ENCSR548PZS (H3K4me3),  
ENCSR756ZKG (CTCF), ENCSR867TPP (H3K27me3), ENCSR604JFH (H3K9me3),  
ENCSR638FRE (H3K36me3), ENCSR581LZU (H3K4me1), ENCSR957CQH  
(H3K79me2), ENCSR701ZDB (H3K4me2), ENCSR857GMX (H3K27ac)

**OCI-LY1** - 11 datasets

ENCSR678AFU (H3F3A), ENCSR859JNA (H3K27me3), ENCSR790EDQ (H3K4me2),  
ENCSR189AGR (H3K9me3), ENCSR768JED (H3K9me2), ENCSR449AYM (H3K36me3),  
ENCSR597UDW (H3K27ac), ENCSR874HSH (H2AFZ), ENCSR184QUS (H3K4me1),  
ENCSR076JBA (H3K9ac), ENCSR422JNY (H3K4me3)

**Loucy** - 11 datasets

ENCSR657RRI (H3K4me3), ENCSR884QDT (H3K9me3), ENCSR429QYS (H3K79me2),  
ENCSR464DKE (CTCF), ENCSR543IKB (H3K9ac), ENCSR183CQK (H3K27me3),  
ENCSR165LOF (H3K4me2), ENCSR900HAP (H2AFZ), ENCSR760ZVL (H4K20me1),  
ENCSR566GSO (H3K27ac), ENCSR036KFJ (H3K4me1)

**IMR-90** - 10 datasets

ENCSR000EFH (MAFK), ENCSR000EFD (RFX5), ENCSR000EFE (MXI1),  
ENCSR000EFF (MAZ), ENCSR000EFG (RCOR1), ENCSR000EFC (CHD1),  
ENCSR000EFI (CTCF), ENCSR000EFM (CEBPB), ENCSR000EFK (POLR2A),  
ENCSR000EFJ (RAD21)

**GM12891** - 10 datasets

ENCSR000EAI (RELA), ENCSR000EAJ (POLR2A), ENCSR000BIK (POLR2A),  
ENCSR000BIL (POLR2AphosphoS5), ENCSR000BIM (TAF1), ENCSR000BII  
(POU2F2), ENCSR000BIJ (SPI1), ENCSR000BJH (PAX5), ENCSR000DKX (CTCF),  
ENCSR000BKJ (YY1)

**T47D** - 9 datasets

ENCSR000BVO (JUND), ENCSR000BQD (ESR1), ENCSR000BNO (CTCF),  
ENCSR000BMX (GATA3), ENCSR000BLM (EP300), ENCSR000BLL (ESR1),  
ENCSR000BKY (FOXA1), ENCSR000BKN (ESR1), ENCSR000BJS (ESR1)

**NT2/D1** - 9 datasets

ENCSR000EXH (SUZ12), ENCSR000EXG (YY1), ENCSR000EXE (H3K27me3),  
ENCSR000EXD (H3K4me3), ENCSR000EXC (H3K9ac), ENCSR000EXB (H3K36me3),  
ENCSR000EXA (H3K4me1), ENCSR000EWZ (H3K9me3), ENCSR000EWY (ZNF274)

**GM12892** - 8 datasets

ENCSR000EAM (POLR2A), ENCSR000EAN (RELA), ENCSR000BHZ (POLR2A),  
ENCSR000BIB (TAF1), ENCSR000BIA (POLR2AphosphoS5), ENCSR000BLT (YY1),  
ENCSR000BJI (PAX5), ENCSR000DKY (CTCF)

**B cell** - 8 datasets

ENCSR000DQR (H3K4me3), ENCSR000DQP (H3K4me3), ENCSR000AUX (H2AFZ),  
ENCSR000AVJ (H4K20me1), ENCSR000AUZ (EZH2), ENCSR000AUP (H3K27ac),  
ENCSR000AUV (CTCF), ENCSR000AUY (H3K4me2)

**PFSK-1** - 6 datasets

ENCSR000BQN (TAF1), ENCSR000BPC (POLR2AphosphoS5), ENCSR000BOY  
(SIN3A), ENCSR000BOX (REST), ENCSR000BJP (REST), ENCSR000BGA (FOXP2)

**HL-60** - 6 datasets

ENCSR000DUP (CTCF), ENCSR000DUO (H3K4me3), ENCSR000BTK (GABPA),  
ENCSR000BTL (POLR2AphosphoS5), ENCSR000BTF (REST), ENCSR000BUW (SPI1)

**NB4** - 5 datasets

ENCSR000FAL (POLR2A), ENCSR000EHS (MAX), ENCSR000EHR (MYC),  
ENCSR000DWP (H3K4me3), ENCSR000DWN (CTCF)

**mononuclear cell** - 4 datasets

ENCSR000EXW (H3K27me3), ENCSR000EXV (H3K4me1), ENCSR000EXU  
(H3K9me3), ENCSR000EXT (H3K4me3)

**kidney epithelial cell** - 4 datasets

ENCSR000DVE (H3K36me3), ENCSR000DVF (H3K27me3), ENCSR000DVH (CTCF),  
ENCSR000DVG (H3K4me3)

**foreskin fibroblast** - 4 datasets

ENCSR000DUH (CTCF), ENCSR000DWS (H3K4me3), ENCSR000DUJ (H3K4me3),  
ENCSR000DWQ (CTCF)

**bronchial epithelial cell** - 4 datasets

ENCSR000DXK (H3K27me3), ENCSR000DXJ (H3K4me3), ENCSR000DXI (CTCF),  
ENCSR000DXH (H3K36me3)

**U2OS** - 4 datasets

ENCSR000EYF (H3K9me3), ENCSR000EYE (H3K36me3), ENCSR000EYD (SETDB1),  
ENCSR000EYC (TRIM28)

**GM06990** - 4 datasets

ENCSR000DQT (H3K36me3), ENCSR000DQU (H3K27me3), ENCSR000DQW (CTCF),  
ENCSR000DQV (H3K4me3)

**Caco-2** - 4 datasets

ENCSR000DQK (H3K36me3), ENCSR000DQL (H3K27me3), ENCSR000DQN (CTCF),  
ENCSR000DQM (H3K4me3)

**BJ** - 4 datasets

ENCSR000DQF (H3K36me3), ENCSR000DQG (H3K27me3), ENCSR000DQH  
(H3K4me3), ENCSR000DQI (CTCF)

**ACC112** - 4 datasets

ENCSR778VGY (H3K4me3), ENCSR059MVB (H3K27ac), ENCSR475NLR (H3K27me3),  
ENCSR897FOZ (H3K36me3)

**erythroblast** - 3 datasets

ENCSR000EXO (POLR2A), ENCSR000EXP (GATA1), ENCSR000EXR (GATA1)

**cardiac fibroblast** - 3 datasets

ENCSR000DTH (H3K4me3), ENCSR000DTF (CTCF), ENCSR000DTE (H3K4me3)

**WI38** - 3 datasets

ENCSR000DXY (H3K4me3), ENCSR000DXZ (H3K4me3), ENCSR000DYB (CTCF)

**SK-N-MC** - 3 datasets

ENCSR000DXL (H3K4me3), ENCSR000BGB (FOXP2), ENCSR000BPL  
(POLR2AphosphoS5)

**LNCaP clone FGC** - 3 datasets

ENCSR000DWF (H3K4me3), ENCSR000DME (CTCF), ENCSR000DMF (CTCF)

**H7-hESC** - 3 datasets

ENCSR000DST (H3K27me3), ENCSR000DSS (H3K36me3), ENCSR000DSR (H3K4me3)

**retinal pigment epithelial cell** - 2 datasets

ENCSR000DVI (CTCF), ENCSR000DVK (H3K4me3)

**fibroblast of villous mesenchyme** - 2 datasets

ENCSR000DVS (H3K4me3), ENCSR000DVQ (CTCF)

**fibroblast of upper leg skin** - 2 datasets

ENCSR000DPI (H3K4me3), ENCSR000DPG (CTCF)

**fibroblast of the aortic adventitia** - 2 datasets

ENCSR000DQA (H3K4me3), ENCSR000DPY (CTCF)

**fibroblast of skin of abdomen** - 2 datasets

ENCSR000DPV (CTCF), ENCSR000DPX (H3K4me3)

**fibroblast of pulmonary artery** - 2 datasets

ENCSR000DUX (CTCF), ENCSR000DUZ (H3K4me3)

**fibroblast of pedal digit skin - 2 datasets**

ENCSR000DPR (H3K4me3), ENCSR000DPP (CTCF)

**fibroblast of mammary gland - 2 datasets**

ENCSR000DUW (H3K4me3), ENCSR000DUU (CTCF)

**fibroblast of gingiva - 2 datasets**

ENCSR000DPU (H3K4me3), ENCSR000DPS (CTCF)

**epithelial cell of proximal tubule - 2 datasets**

ENCSR000DXF (H3K4me3), ENCSR000DXD (CTCF)

**epithelial cell of esophagus - 2 datasets**

ENCSR000DTT (H3K4me3), ENCSR000DTR (CTCF)

**choroid plexus epithelial cell - 2 datasets**

ENCSR000DTN (H3K4me3), ENCSR000DTL (CTCF)

**cardiac muscle cell - 2 datasets**

ENCSR000DTK (H3K4me3), ENCSR000DTI (CTCF)

**brain microvascular endothelial cell - 2 datasets**

ENCSR000DTC (H3K4me3), ENCSR000DTA (CTCF)

**astrocyte of the spinal cord - 2 datasets**

ENCSR000DSW (H3K4me3), ENCSR000DSU (CTCF)

**astrocyte of the cerebellum - 2 datasets**

ENCSR000DSY (H3K4me3), ENCSR000DSZ (CTCF)

**WERI-Rb-1 - 2 datasets**

ENCSR000DXW (CTCF), ENCSR000DXU (H3K4me3)

**SH-SY5Y - 2 datasets**

ENCSR000EYB (GATA2), ENCSR000EXZ (GATA3)

**HFF-Myc - 2 datasets**

ENCSR000DUM (CTCF), ENCSR000DUK (H3K4me3)

**H54 - 2 datasets**

ENCSR000DKN (CTCF), ENCSR000DKM (POLR2A)

**GM19193 - 2 datasets**

ENCSR000EBM (RELA), ENCSR000EBK (POLR2A)

**GM19099 - 2 datasets**

ENCSR000EBI (RELA), ENCSR000EBG (POLR2A)

**GM18951** - 2 datasets  
ENCSR000EBD (RELA), ENCSR000EBC (POLR2A)

**GM18526** - 2 datasets  
ENCSR000EBA (RELA), ENCSR000EAY (POLR2A)

**GM18505** - 2 datasets  
ENCSR000EAW (RELA), ENCSR000EAU (POLR2A)

**GM15510** - 2 datasets  
ENCSR000EAR (POLR2A), ENCSR000EAQ (RELA)

**GM12875** - 2 datasets  
ENCSR000DRU (CTCF), ENCSR000DRS (H3K4me3)

**GM12866** - 2 datasets  
ENCSR000DRG (H3K4me3), ENCSR000DRF (CTCF)

**GM12865** - 2 datasets  
ENCSR000DRE (CTCF), ENCSR000DRC (H3K4me3)

**GM12864** - 2 datasets  
ENCSR000DRB (CTCF), ENCSR000DQZ (H3K4me3)

**GM10847** - 2 datasets  
ENCSR000DYO (POLR2A), ENCSR000DYM (RELA)

**GM08714** - 2 datasets  
ENCSR000EUI (ZNF274), ENCSR000FCL (H3K4me3)

**BE2C** - 2 datasets  
ENCSR000DQD (CTCF), ENCSR000DQB (H3K4me3)

**spleen** - 1 dataset  
ENCSR000DNI (CTCF)

**skeletal muscle cell** - 1 dataset  
ENCSR000DXT (H3K4me3)

**pancreas** - 1 dataset  
ENCSR000DND (CTCF)

**medulloblastoma** - 1 dataset  
ENCSR000DMY (CTCF)

**lung** - 1 dataset  
ENCSR000DMH (CTCF)

**kidney** - 1 dataset  
ENCSR000DMC (CTCF)

**Raji** - 1 dataset  
ENCSR000EXX (POLR2A)

**Jurkat** - 1 dataset  
ENCSR000DVU (H3K4me3)

**GM20000** - 1 dataset  
ENCSR000DLG (CTCF)

**GM19240** - 1 dataset  
ENCSR000DLF (CTCF)

**GM19239** - 1 dataset  
ENCSR000DLE (CTCF)

**GM19238** - 1 dataset  
ENCSR000DLD (CTCF)

**GM13977** - 1 dataset  
ENCSR000DLB (CTCF)

**GM13976** - 1 dataset  
ENCSR000DKZ (CTCF)

**GM12874** - 1 dataset  
ENCSR000DRR (CTCF)

**GM12873** - 1 dataset  
ENCSR000DRP (CTCF)

**GM12872** - 1 dataset  
ENCSR000DRN (CTCF)

**GM12871** - 1 dataset  
ENCSR000DRL (CTCF)

**GM12870** - 1 dataset  
ENCSR000DRK (CTCF)

**GM12869** - 1 dataset  
ENCSR000DRJ (CTCF)

**GM12868** - 1 dataset  
ENCSR000DRI (CTCF)



**GM12867** - 1 dataset  
ENCSR000DRH (CTCF)

**GM12801** - 1 dataset  
ENCSR000DQY (CTCF)

**GM10266** - 1 dataset  
ENCSR000DKR (CTCF)

**GM10248** - 1 dataset  
ENCSR000DKP (CTCF)
